# Supplementary material
Source: publisher figshare collection journal article supplement (https://asha.figshare.com/articles/dataset/_/25733679)
Supplement: Supplementary file 1 [file 1]

**Supplemental Material S3.** Multivariable-adjusted associations of pure-tone average with speech-in-noise performance, ACHIEVE baseline (2018–20) and ARIC-NCS Visit 6/7 (2016–17/2018–19) after excluding ACHIEVE participants with hearing loss above 50 dB HL: Multivariable-adjusted linear regression with spline term at mean pure-tone average (PTA), which is 33 dB HL (standardized PTA = 0) to estimate change in the quick speech-in-noise score associated with every standard deviation worse in PTA when PTA <33 dB HL and PTA ≥33 dB HL respectively. (a) Model adjusted for age, sex, race, field center, education, body mass index, smoking, hypertension, diabetes, and stroke ( $N = 571$ ). (b) Model adjusted for age, sex, race, field center, education, body mass index, smoking, hypertension, diabetes, stroke, intracranial volume, global cognitive performance, total brain volume, fractional anisotropy, mean diffusivity, white matter hyperintensities volume ( $N = 556$ ).

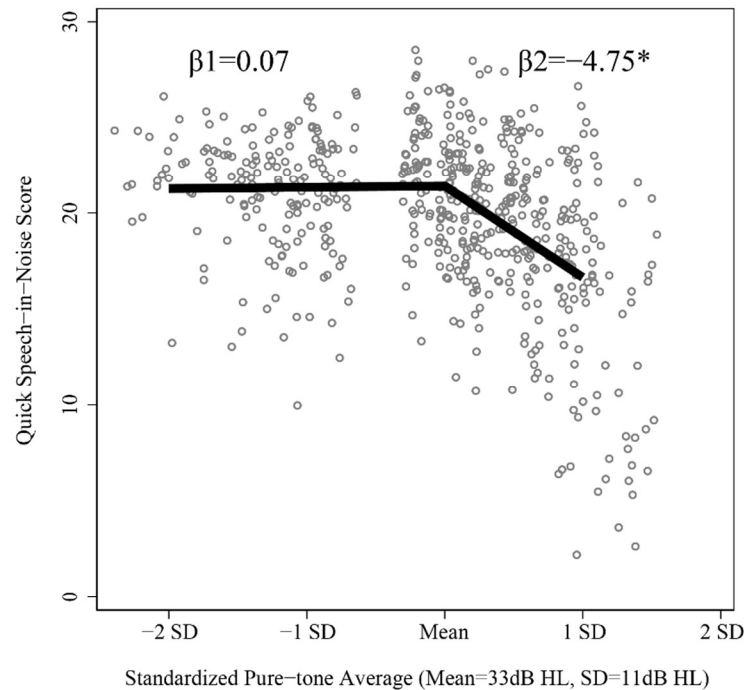

(a)

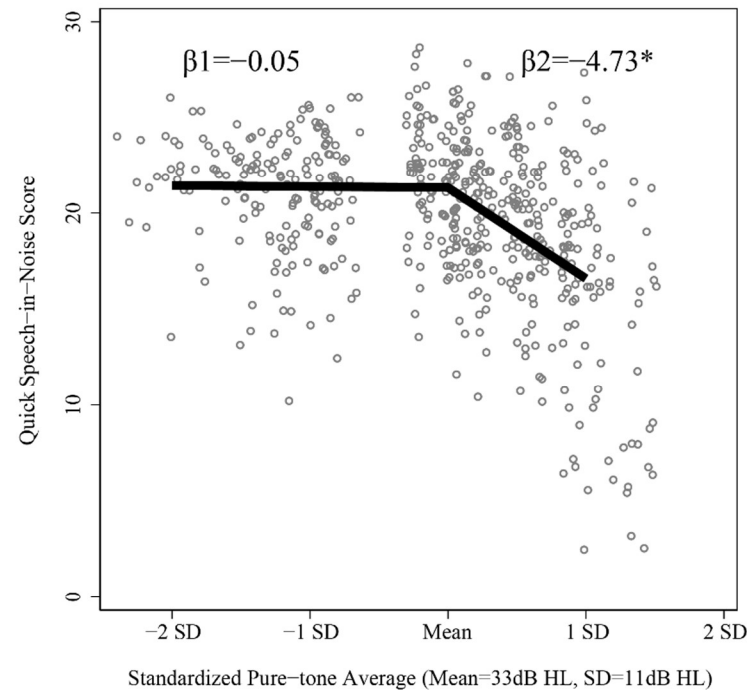

(b)

\* $P < 0.05$

**Abbreviations:** ACHIEVE: Aging and Cognitive Health Evaluation in Elders; ARIC-NCS: Atherosclerosis Risk in Communities Neurocognitive Study; dB HL: decibels hearing level.
