# Supplementary material
Source: publisher figshare collection journal article supplement (https://asha.figshare.com/articles/dataset/_/25733679)
Supplement: Supplementary file 6 [file 1]

**Supplemental Material S11.** Multivariable-adjusted associations of magnetic resonance imaging (MRI) measures with speech-in-noise performance adjusting for pure-tone average (PTA) or cognition only, ACHIEVE baseline (2018–20) and ARIC-NCS Visit 6/7 (2016–17/2018–19).

| Worse MRI Measures, per SD <sup>a</sup> | Covariates + PTA (N=584) <sup>b</sup> |         | Covariates + Global Cognition (N=584) <sup>c</sup> |         |
|-----------------------------------------|---------------------------------------|---------|----------------------------------------------------|---------|
|                                         | Estimate (95% CI)                     | P-value | Estimate (95% CI)                                  | P-value |
| Brain Volumes                           |                                       |         |                                                    |         |
| Total brain                             | -0.03 (-0.80, 0.74)                   | 0.95    | 0.35 (-0.58, 1.27)                                 | 0.46    |
| Temporal lobe                           | -0.54 (-1.09, 0.02)                   | 0.06    | -0.56 (-1.23, 0.11)                                | 0.10    |
| Frontal lobe                            | -0.41 (-0.99, 0.16)                   | 0.16    | -0.07 (-0.76, 0.62)                                | 0.84    |
| Occipital lobe                          | -0.01 (-0.49, 0.47)                   | 0.97    | 0.03 (-0.55, 0.60)                                 | 0.93    |
| Parietal lobe                           | 0.02 (-0.55, 0.60)                    | 0.94    | -0.02 (-0.70, 0.66)                                | 0.96    |
| Deep gray subcortical structures        | -0.25 (-0.70, 0.21)                   | 0.29    | -0.16 (-0.70, 0.39)                                | 0.57    |
| Fractional anisotropy                   | 0.04 (-0.37, 0.45)                    | 0.85    | 0.16 (-0.32, 0.65)                                 | 0.51    |
| Mean diffusivity                        | 0.02 (-0.32, 0.36)                    | 0.90    | 0.07 (-0.34, 0.48)                                 | 0.74    |
| White matter hyperintensities volume    | -0.23 (-0.56, 0.11)                   | 0.19    | -0.17 (-0.57, 0.22)                                | 0.39    |

**Abbreviations:** ACHIEVE: Aging and Cognitive Health Evaluation in Elders; ARIC-NCS: Atherosclerosis Risk in Communities Neurocognitive Study; CI: confidence interval; SD: standard deviation.

<sup>a</sup> Multivariable-adjusted linear regression to estimate change in the quick speech-in-noise score associated with every SD worse in brain MRI measures.

<sup>b</sup> Models adjusted for age, sex, race, field center, education, body mass index, smoking, hypertension, diabetes, stroke, intracranial volume, and pure-tone average.

<sup>c</sup> Models adjusted for age, sex, race, field center, education, body mass index, smoking, hypertension, diabetes, stroke, intracranial volume, and global cognitive performance.
