# Supplementary material
Source: publisher figshare collection journal article supplement (https://asha.figshare.com/articles/dataset/_/25733679)
Supplement: Supplementary file 7 [file 1]

**Supplemental Material S7.** Multivariable-adjusted associations of global and domain-specific cognitive performance with speech-in-noise performance considering cohort, ACHIEVE baseline (2018–20) and ARIC-NCS Visit 6/7 (2016–17/2018–19).

| Worse Cognitive Performance, per SD <sup>a</sup> | Covariates + Cohort (N=600) <sup>b</sup> |                  |
|--------------------------------------------------|------------------------------------------|------------------|
|                                                  | Estimate (95% CI)                        | P-value          |
| Global                                           | <b>-1.12 (-1.57, -0.67)</b>              | <b>&lt;0.001</b> |
| Language                                         | <b>-1.04 (-1.49, -0.59)</b>              | <b>&lt;0.001</b> |
| Executive function                               | <b>-0.84 (-1.30, -0.39)</b>              | <b>&lt;0.001</b> |
| Memory                                           | <b>-0.54 (-0.94, -0.14)</b>              | <b>0.01</b>      |

**Abbreviations:** ACHIEVE: Aging and Cognitive Health Evaluation in Elders; ARIC-NCS: Atherosclerosis Risk in Communities Neurocognitive Study; CI: confidence interval; SD: standard deviation.

<sup>a</sup> Multivariable-adjusted linear regression to estimate change in the quick speech-in-noise score associated with every SD worse in cognitive performance.

<sup>b</sup> Models adjusted for age, sex, race, field center, education, body mass index, smoking, hypertension, diabetes, stroke, and cohort (ACHIEVE/ARIC-NCS).
