# Supplementary material
Source: publisher figshare collection journal article supplement (https://asha.figshare.com/articles/dataset/_/25733679)
Supplement: Supplementary file 8 [file 1]

**Supplemental Material S13.** Multivariable-adjusted associations of global and domain-specific cognitive performance with speech-in-noise performance, ACHIEVE baseline (2018–20) and ARIC-NCS Visit 6/7 (2016–17/2018–19).

| <b>Worse Cognitive Performance, per SD<sup>a</sup></b> | <b>Model 1: Covariates (N=600)<sup>b</sup></b> |                | <b>Model 2: Covariates + Other Predictors (N=584)<sup>c</sup></b> |                |
|--------------------------------------------------------|------------------------------------------------|----------------|-------------------------------------------------------------------|----------------|
|                                                        | <b>PR (95% CI)</b>                             | <b>P-value</b> | <b>PR (95% CI)</b>                                                | <b>P-value</b> |
| Global                                                 | <b>1.28 (1.06, 1.54)</b>                       | <b>0.01</b>    | <b>1.25 (1.04, 1.49)</b>                                          | <b>0.02</b>    |
| Language                                               | 1.15 (0.95, 1.40)                              | 0.16           | 1.20 (0.99, 1.46)                                                 | 0.06           |
| Executive function                                     | <b>1.22 (1.03, 1.44)</b>                       | <b>0.02</b>    | <b>1.20 (1.01, 1.43)</b>                                          | <b>0.04</b>    |
| Memory                                                 | 1.14 (0.96, 1.34)                              | 0.13           | 1.14 (0.98, 1.33)                                                 | 0.09           |

**Abbreviations:** ACHIEVE: Aging and Cognitive Health Evaluation in Elders; ARIC-NCS: Atherosclerosis Risk in Communities Neurocognitive Study; PR: prevalence ratio; CI: confidence interval; SD: standard deviation.

<sup>a</sup> Multivariable-adjusted Poisson regression with robust standard errors to estimate prevalence ratio of being in the lowest quartile of quick speech-in-noise score associated with every SD worse in cognitive performance.

<sup>b</sup> Model 1 adjusted for age, sex, race, field center, education, body mass index, smoking, hypertension, diabetes, and stroke.

<sup>c</sup> Model 2 adjusted for age, sex, race, field center, education, body mass index, smoking, hypertension, diabetes, stroke, intracranial volume, pure-tone average, total brain volume, fractional anisotropy, mean diffusivity, and white matter hyperintensities volume.
