# Supplementary material
Source: publisher figshare collection journal article supplement (https://asha.figshare.com/articles/dataset/_/25733679)
Supplement: Supplementary file 9 [file 1]

**Supplemental Material S6.** Multivariable-adjusted associations of magnetic resonance imaging (MRI) measures with speech-in-noise performance considering cohort, ACHIEVE baseline (2018–20) and ARIC-NCS Visit 6/7 (2016–17/2018–19).

| Worse MRI Measures, per SD <sup>a</sup> | Covariates + Cohort (N=586) <sup>b</sup> |             |
|-----------------------------------------|------------------------------------------|-------------|
|                                         | Estimate (95% CI)                        | P-value     |
| Brain Volumes                           |                                          |             |
| Total brain                             | -0.01 (-0.93, 0.92)                      | 0.99        |
| Temporal lobe                           | <b>-0.82 (-1.49, -0.16)</b>              | <b>0.02</b> |
| Frontal lobe                            | -0.31 (-1.00, 0.38)                      | 0.38        |
| Occipital lobe                          | -0.05 (-0.63, 0.53)                      | 0.86        |
| Parietal lobe                           | -0.16 (-0.85, 0.53)                      | 0.64        |
| Deep gray subcortical structures        | -0.30 (-0.84, 0.25)                      | 0.28        |
| Fractional anisotropy                   | 0.06 (-0.43, 0.55)                       | 0.81        |
| Mean diffusivity                        | -0.05 (-0.46, 0.35)                      | 0.79        |
| White matter hyperintensities volume    | -0.27 (-0.67, 0.13)                      | 0.18        |

**Abbreviations:** ACHIEVE: Aging and Cognitive Health Evaluation in Elders; ARIC-NCS: Atherosclerosis Risk in Communities Neurocognitive Study; CI: confidence interval; SD: standard deviation.

<sup>a</sup> Multivariable-adjusted linear regression to estimate change in the quick speech-in-noise score associated with every SD worse in brain MRI measures.

<sup>b</sup> Models adjusted for age, sex, race, field center, education, body mass index, smoking, hypertension, diabetes, stroke, intracranial volume, and cohort (ACHIEVE/ARIC-NCS).
