# Supplementary material
Source: publisher figshare collection journal article supplement (https://asha.figshare.com/articles/dataset/_/25733679)
Supplement: Supplementary file 10 [file 1]

**Supplemental Material S1.** Characteristics of participants by cohort (Audiometric Hearing Loss) at ACHIEVE baseline (2018–20) and ARIC-NCS Visit 6/7 (2016–17/2018–19).

|                                                      | Total<br>N=602 | Cohort                          |                                    | P-value <sup>a</sup> |
|------------------------------------------------------|----------------|---------------------------------|------------------------------------|----------------------|
|                                                      |                | ACHIEVE (hearing loss)<br>N=427 | ARIC-NCS (normal hearing)<br>N=175 |                      |
| <b>Age (years), Mean (SD)</b>                        | 76.8 (3.9)     | 75.9 (4.0)                      | 79.0 (2.8)                         | <0.001               |
| <b>Female, N (%)</b>                                 | 338 (56.1)     | 218 (51.1)                      | 120 (68.6)                         | <0.001               |
| <b>Black, N (%)</b>                                  | 104 (17.3)     | 47 (11.0)                       | 57 (32.6)                          | <0.001               |
| <b>Education, N (%)</b>                              |                |                                 |                                    | 0.95                 |
| Below High School                                    | 23 (3.8)       | 16 (3.7)                        | 7 (4.0)                            |                      |
| High School or Equivalent                            | 260 (43.2)     | 183 (42.9)                      | 77 (44.0)                          |                      |
| Above High School                                    | 319 (53.0)     | 228 (53.4)                      | 91 (52.0)                          |                      |
| <b>Cigarette Smoking, N (%)</b>                      |                |                                 |                                    | 0.07                 |
| Never                                                | 289 (48.0)     | 211 (49.4)                      | 78 (44.6)                          |                      |
| Former                                               | 291 (48.3)     | 205 (48.0)                      | 86 (49.1)                          |                      |
| Current                                              | 22 (3.7)       | 11 (2.6)                        | 11 (6.3)                           |                      |
| <b>Body Mass Index (kg/m<sup>2</sup>), Mean (SD)</b> | 28.9 (5.4)     | 28.8 (5.4)                      | 29.0 (5.4)                         | 0.70                 |
| <b>Hypertension, N (%)</b>                           | 422 (70.1)     | 280 (65.6)                      | 142 (81.1)                         | <0.001               |
| <b>Diabetes, N (%)</b>                               | 132 (21.9)     | 76 (17.8)                       | 56 (32.0)                          | <0.001               |
| <b>Stroke, N (%)</b>                                 | 34 (5.6)       | 27 (6.3)                        | 7 (4.0)                            | 0.26                 |
| <b>Pure-tone Average (dB HL), Mean (SD)</b>          | 33.1 (11.4)    | 39.2 (7.0)                      | 18.5 (4.8)                         | <0.001               |
| <b>QuickSIN score, Mean (SD)</b>                     | 19.3 (4.9)     | 18.6 (5.4)                      | 21.1 (3.0)                         | <0.001               |

**Abbreviations:** ACHIEVE: Aging and Cognitive Health Evaluation in Elders; ARIC-NCS: Atherosclerosis Risk in Communities Neurocognitive Study; SD: standard deviation; dB HL: decibels hearing level; QuickSIN: Quick Speech-in-Noise.

<sup>a</sup> P-values were calculated by t-test for continuous variables and Pearson chi-squared test for categorical variables.
