# Supplementary material
Source: publisher figshare collection journal article supplement (https://asha.figshare.com/articles/dataset/_/25733679)
Supplement: Supplementary file 11 [file 1]

**Supplemental Material S4.** Multivariable-adjusted associations of magnetic resonance imaging (MRI) measures with speech-in-noise performance after excluding ACHIEVE participants with hearing loss above 50 dB HL, ACHIEVE baseline (2018–20) and ARIC-NCS Visit 6/7 (2016–17/2018–19).

| Worse MRI Measures, per SD <sup>a</sup> | Model 1: Covariates (N=558) <sup>b</sup> |             | Model 2: Covariates + Other Predictors (N=556) <sup>c</sup> |         |
|-----------------------------------------|------------------------------------------|-------------|-------------------------------------------------------------|---------|
|                                         | Estimate (95% CI)                        | P-value     | Estimate (95% CI)                                           | P-value |
| Brain Volumes                           |                                          |             |                                                             |         |
| Total brain                             | -0.14 (-0.99, 0.71)                      | 0.74        | 0.15 (-0.61, 0.91)                                          | 0.70    |
| Temporal lobe                           | <b>-0.68 (-1.29, -0.07)</b>              | <b>0.03</b> | -0.40 (-0.95, 0.16)                                         | 0.16    |
| Frontal lobe                            | -0.36 (-1.00, 0.28)                      | 0.27        | -0.23 (-0.80, 0.34)                                         | 0.43    |
| Occipital lobe                          | 0.03 (-0.50, 0.57)                       | 0.91        | 0.10 (-0.37, 0.57)                                          | 0.66    |
| Parietal lobe                           | -0.05 (-0.68, 0.59)                      | 0.88        | 0.07 (-0.49, 0.63)                                          | 0.81    |
| Deep gray subcortical structures        | -0.28 (-0.79, 0.23)                      | 0.28        | -0.19 (-0.64, 0.26)                                         | 0.42    |
| Fractional anisotropy                   | 0.13 (-0.32, 0.58)                       | 0.56        | 0.21 (-0.18, 0.61)                                          | 0.29    |
| Mean diffusivity                        | 0.10 (-0.27, 0.48)                       | 0.59        | 0.18 (-0.15, 0.52)                                          | 0.29    |
| White matter hyperintensities volume    | -0.16 (-0.52, 0.21)                      | 0.40        | -0.09 (-0.41, 0.24)                                         | 0.59    |

**Abbreviations:** ACHIEVE: Aging and Cognitive Health Evaluation in Elders; ARIC-NCS: Atherosclerosis Risk in Communities Neurocognitive Study; dB HL: decibels hearing level; CI: confidence interval; SD: standard deviation.

<sup>a</sup> Multivariable-adjusted linear regression to estimate change in the quick speech-in-noise score associated with every SD worse in brain MRI measures.

<sup>b</sup> Model 1 adjusted for age, sex, race, field center, education, body mass index, smoking, hypertension, diabetes, stroke, and intracranial volume.

<sup>c</sup> Model 2 adjusted for age, sex, race, field center, education, body mass index, smoking, hypertension, diabetes, stroke, intracranial volume, pure-tone average, and global cognitive performance.
