# Supplementary material
Source: publisher figshare collection journal article supplement (https://asha.figshare.com/articles/dataset/_/25733679)
Supplement: Supplementary file 12 [file 1]

**Supplemental Material S9.** Multivariable-adjusted associations of global and domain-specific cognitive performance with speech-in-noise performance by cohort, ACHIEVE baseline (2018–20) and ARIC-NCS Visit 6/7 (2016–17/2018–19).

| <b>Worse Cognitive Performance, per SD<sup>a</sup></b> | <b>Cohort 1: ACHIEVE (N=427)<sup>b</sup></b> |                  | <b>Cohort 2: ARIC-NCS (N=173)<sup>b</sup></b> |                | <b>P-interaction</b> |
|--------------------------------------------------------|----------------------------------------------|------------------|-----------------------------------------------|----------------|----------------------|
|                                                        | <b>Estimate (95% CI)</b>                     | <b>P-value</b>   | <b>Estimate (95% CI)</b>                      | <b>P-value</b> |                      |
| Global                                                 | <b>-1.28 (-1.82, -0.75)</b>                  | <b>&lt;0.001</b> | <b>-0.83 (-1.51, -0.14)</b>                   | <b>0.02</b>    | 0.27                 |
| Language                                               | <b>-1.08 (-1.59, -0.57)</b>                  | <b>&lt;0.001</b> | <b>-0.94 (-1.69, -0.19)</b>                   | <b>0.01</b>    | 0.75                 |
| Executive function                                     | <b>-1.08 (-1.61, -0.56)</b>                  | <b>&lt;0.001</b> | -0.33 (-1.05, 0.38)                           | 0.36           | 0.07                 |
| Memory                                                 | <b>-0.50 (-0.99, -0.02)</b>                  | <b>0.04</b>      | -0.61 (-1.25, 0.04)                           | 0.07           | 0.80                 |

**Abbreviations:** ACHIEVE: Aging and Cognitive Health Evaluation in Elders; ARIC-NCS: Atherosclerosis Risk in Communities Neurocognitive Study; CI: confidence interval; SD: standard deviation.

<sup>a</sup> Multivariable-adjusted linear regression to estimate change in the quick speech-in-noise score associated with every SD worse in cognitive performance. An interaction term between cognitive performance and cohort (ACHIEVE/ARIC-NCS) was included.

<sup>b</sup> Models adjusted for age, sex, race, field center, education, body mass index, smoking, hypertension, diabetes, and stroke.
