# Supplementary material
Source: publisher figshare collection journal article supplement (https://asha.figshare.com/articles/dataset/_/25733679)
Supplement: Supplementary file 13 [file 1]

**Supplemental Material S8.** Multivariable-adjusted associations of magnetic resonance imaging (MRI) measures with speech-in-noise performance by cohort, ACHIEVE baseline (2018–20) and ARIC-NCS Visit 6/7 (2016–17/2018–19).

| Worse MRI Measures, per SD <sup>a</sup> | Cohort 1: ACHIEVE (N=413) <sup>b</sup> |                 | Cohort 2: ARIC-NCS (N=173) <sup>b</sup> |                 | <i>P</i> -interaction |
|-----------------------------------------|----------------------------------------|-----------------|-----------------------------------------|-----------------|-----------------------|
|                                         | Estimate (95% CI)                      | <i>P</i> -value | Estimate (95% CI)                       | <i>P</i> -value |                       |
| Brain Volumes                           |                                        |                 |                                         |                 |                       |
| Total brain                             | -0.12 (-1.04, 0.80)                    | 0.80            | 0.04 (-1.12, 1.19)                      | 0.95            | 0.74                  |
| Temporal lobe                           | <b>-0.90 (-1.60, -0.21)</b>            | <b>0.01</b>     | -0.73 (-1.61, 0.15)                     | 0.10            | 0.70                  |
| Frontal lobe                            | -0.47 (-1.18, 0.25)                    | 0.20            | -0.30 (-1.20, 0.61)                     | 0.52            | 0.71                  |
| Occipital lobe                          | -0.21 (-0.83, 0.40)                    | 0.49            | 0.24 (-0.61, 1.09)                      | 0.57            | 0.31                  |
| Parietal lobe                           | -0.23 (-0.94, 0.47)                    | 0.52            | -0.00 (-0.95, 0.94)                     | 0.99            | 0.61                  |
| Deep gray subcortical structures        | -0.34 (-0.93, 0.25)                    | 0.26            | -0.21 (-1.01, 0.59)                     | 0.61            | 0.76                  |
| Fractional anisotropy                   | -0.17 (-0.72, 0.38)                    | 0.54            | 0.55 (-0.15, 1.25)                      | 0.12            | 0.07                  |
| Mean diffusivity                        | -0.13 (-0.60, 0.34)                    | 0.59            | 0.06 (-0.63, 0.74)                      | 0.87            | 0.66                  |
| White matter hyperintensities volume    | -0.43 (-0.90, 0.05)                    | 0.08            | -0.17 (-0.79, 0.45)                     | 0.59            | 0.51                  |

**Abbreviations:** ACHIEVE: Aging and Cognitive Health Evaluation in Elders; ARIC-NCS: Atherosclerosis Risk in Communities Neurocognitive Study; CI: confidence interval; SD: standard deviation.

<sup>a</sup> Multivariable-adjusted linear regression to estimate change in the quick speech-in-noise score associated with every SD worse in brain MRI measures. An interaction term between brain MRI measure and cohort (ACHIEVE/ARIC-NCS) was included.

<sup>b</sup> Models adjusted for age, sex, race, field center, education, body mass index, smoking, hypertension, diabetes, stroke, and intracranial volume.
