# Supplementary material
Source: publisher figshare collection journal article supplement (https://asha.figshare.com/articles/dataset/_/25733679)
Supplement: Supplementary file 14 [file 1]

**Supplemental Material S12.** Multivariable-adjusted associations of magnetic resonance imaging (MRI) measures with speech-in-noise performance, ACHIEVE baseline (2018–20) and ARIC-NCS Visit 6/7 (2016–17/2018–19).

| Worse MRI Measures, per SD <sup>a</sup> | Model 1: Covariates (N=586) <sup>b</sup> |             | Model 2: Covariates + Other Predictors (N=584) <sup>c</sup> |         |
|-----------------------------------------|------------------------------------------|-------------|-------------------------------------------------------------|---------|
|                                         | PR (95% CI)                              | P-value     | PR (95% CI)                                                 | P-value |
| Brain Volumes                           |                                          |             |                                                             |         |
| Total brain                             | 1.16 (0.79, 1.68)                        | 0.45        | 1.11 (0.76, 1.63)                                           | 0.58    |
| Temporal lobe                           | <b>1.35 (1.01, 1.82)</b>                 | <b>0.04</b> | 1.19 (0.86, 1.63)                                           | 0.29    |
| Frontal lobe                            | 1.23 (0.94, 1.60)                        | 0.13        | 1.27 (0.97, 1.67)                                           | 0.09    |
| Occipital lobe                          | 0.99 (0.79, 1.26)                        | 0.97        | 1.02 (0.80, 1.30)                                           | 0.89    |
| Parietal lobe                           | 1.21 (0.89, 1.64)                        | 0.22        | 1.09 (0.81, 1.46)                                           | 0.57    |
| Deep gray subcortical structures        | 1.19 (0.97, 1.47)                        | 0.10        | 1.15 (0.93, 1.41)                                           | 0.20    |
| Fractional anisotropy                   | 1.00 (0.83, 1.21)                        | 0.99        | 1.01 (0.83, 1.22)                                           | 0.92    |
| Mean diffusivity                        | 1.02 (0.87, 1.20)                        | 0.82        | 0.98 (0.84, 1.13)                                           | 0.74    |
| White matter hyperintensities volume    | 1.10 (0.96, 1.26)                        | 0.18        | 1.07 (0.92, 1.25)                                           | 0.36    |

**Abbreviations:** ACHIEVE: Aging and Cognitive Health Evaluation in Elders; ARIC-NCS: Atherosclerosis Risk in Communities Neurocognitive Study; PR: prevalence ratio; CI: confidence interval; SD: standard deviation.

<sup>a</sup> Multivariable-adjusted Poisson regression with robust standard errors to estimate prevalence ratio of being in the lowest quartile of quick speech-in-noise score associated with every SD worse in brain MRI measures.

<sup>b</sup> Model 1 adjusted for age, sex, race, field center, education, body mass index, smoking, hypertension, diabetes, stroke, and intracranial volume.

<sup>c</sup> Model 2 adjusted for age, sex, race, field center, education, body mass index, smoking, hypertension, diabetes, stroke, intracranial volume, pure-tone average, and global cognitive performance.
